# Supplementary material for: Center-To-Periphery Arterial Stiffness Gradient Is Attenuated and/or Reversed in Pregnancy-Associated Hypertension
Source: Front Cardiovasc Med. 2021 Dec 24;8:766723. doi: 10.3389/fcvm.2021.766723 (PMC8739768; doi:10.3389/fcvm.2021.766723)
Supplement: Supplementary file 1 [file Table_1.xlsx]

## Sheet: Table_1_2_Descriptive 
	Table 1. Demographic, anthropometric, cardiovascular risk factors and peripheral and central hameodynamic characteristics in non-pregnant and pregnant women
		Non-pregnant healthy women [n = 401]					Pregnant healthy women [n = 10]					Pregnant Gestational Hypertension Women [n = 8]					Pregnant Preeclampsia Women [n = 8]					Pregnant-induced Hypertenssion Women [n = 16]					Total Women [n = 427]
		MV	SD	SE	Min	Max	MV	SD	SE	Min	Max	MV	SD	DE	Min	Max	MV	SD	DE	Min	Max	MV	SD	DE	Min	Max	MV	SD	DE	Min	Max
	Demographic, anthropometric and cardiovascular risk factors
	Age [years]	22.8444	5.98907	0.29908	18	40.7	29.4	6.16802	1.9505	21	40	30.875	6.68554	2.36369	20	40	33.625	5.87823	2.07827	22	40	32.25	6.245	1.56125	20	40	23.3504	6.31915	0.305805	18	40.7
	Smoke [%]
	Never	0.818					0.3					1					1					1					0.812808
	Actual	0.158					0.7					0					0					0					0.165025
	Ex	0.018					0					0					0					0					0.0172414
	Abstinence	0.005					0					0					0					0					0.00492611
	Hypertension [%]	0.04					0					1					1					1					0.0749415
	Dislipidemia [%]	0.072					0.2					0					0					0					0.0725995
	Diabetes [%]	0							0			0							0					0					0
	Sedentarism [%]	0.586					1					1					1					1					0.630081
	Pharmacological Hypertension treatment [%]	0.017					0					0.125					0.125					0.125					0.0210773
	Carotid atherosclerotic plaques [%]			0					0			0							0					0					0
	Body weight [Kg.]	60.7496	12.0537	0.615918	38.1	128	67.1	7.325	2.31637	56	77	76.5	10.9022	3.8545	60	90	97	12.5584	4.44008	83	113	86.75	15.5285	3.88212	60	113	61.922	13.1226	0.648873	38.1	128
	Body height [m]	1.62218	0.063831	0.00325313	1.32	1.83	157.6	6.75278	2.13542	148	173	159.625	5.34355	1.88923	150	166	160.25	8.61477	3.04578	149	174	159.938	6.93271	1.73318	149	174	11.5804	38.4037	1.89432	1.32	174
	Body mass index [Kg/m2]	23.0423	4.23232	0.216828	16.5	48.77	27.1321	3.56149	1.12624	20.7157	31.2295	30.2119	5.42044	1.91641	21.77	38.2222	38.1019	6.59759	2.3326	27.7447	48.272	34.1569	7.11512	1.77878	21.77	48.272	23.5798	4.88955	0.242366	16.5	48.77
	Peripheral and central haemodynamic parameters
	Brachial SBP [mmHg]	117.61	10.6991	0.541768	85	177	114	5.07718	1.60555	106	121	122.5	13.2557	4.68661	98	138	131.25	9.19239	3.25	114	143	126.875	11.9101	2.97752	98	143	117.88	10.7951	0.529275	85	177
	Brachial DBP [mmHg]	69.2205	8.91044	0.451198	49	103	65.1	10.0935	3.19183	52	85	72	8.97616	3.17355	59	82	77.75	8.58154	3.03403	68	93	74.875	8.98795	2.24699	59	93	69.3389	9.00993	0.441748	49	103
	Heart rate [beats/minute]	74.7769	10.9126	0.552579	50	113	81.3	15.9586	5.04656	52	97	86.25	9.16125	3.23899	72	96	87.125	16.8729	5.96549	66	110	86.6875	13.1236	3.2809	66	110	75.3918	11.3792	0.557913	50	113
	Aortic SBP [mmHg]	101.767	9.88468	0.508413	79	156	99.7778	6.75977	2.25326	90	109	105.625	11.4635	4.05294	84	120	114.625	9.10161	3.2179	99	126	110.125	11.0265	2.75662	84	126	102.055	9.99313	0.497793	79	156
	Aortic DBP [mmHg]	70.3783	8.9749	0.461619	51	103	67.3333	10.2103	3.40343	55	87	73.875	9.4027	3.32436	60	85	79.25	8.32809	2.94443	70	94	76.5625	9.01827	2.25457	60	94	70.5558	9.07452	0.452034	51	103
	Carotid and brachial strctural and haemodynamic parameters
	Left CCA SysD [mm]	6.60518	0.492933	0.026733	4.84	9.55	7.075	0.386731	0.122295	6.13	7.49	7.1575	0.271806	0.096098	6.89	7.53	7.10125	0.670659	0.237114	5.78	7.98	7.12938	0.495197	0.123799	5.78	7.98	6.64093	0.506212	0.0264601	4.84	9.55
	Left CCA DD [mm]	6.04047	0.471279	0.0255587	4.39	8.4	6.467	0.423584	0.133949	5.75	7.19	6.605	0.213675	0.0755456	6.37	6.93	6.66875	0.645787	0.22832	5.55	7.54	6.63688	0.465843	0.116461	5.55	7.54	6.0782	0.488645	0.0255419	4.39	8.4
	Left CCA IMT [mm]	0.503603	0.0902003	0.0048918	0.311	1.352	0.5271	0.0821319	0.0259724	0.422	0.67	0.533875	0.0892387	0.0315507	0.387	0.644	0.594625	0.0973094	0.0344041	0.473	0.774	0.56425	0.0954955	0.0238739	0.387	0.774	0.506896	0.0909017	0.00475151	0.311	1.352
	Left CCA Peak Systolic Velocity [cm/s]	97.4163	19.3056	1.09297	55.8	191.9	85.15	21.1137	10.5569	68.5	116.1	100.7	27.824	12.4433	79.9	144.6	87.2	17.0193	7.61124	59	100.9	93.95	22.8788	7.2349	59	144.6	97.1595	19.4273	1.07598	55.8	191.9
	Left CCA End Diastolic Velocity [cm/s]	26.7225	5.98815	0.339012	5.41	49.7	29.35	5.34322	2.67161	22.2	34.3	26.64	3.64184	1.62868	22.8	31.7	24.9	3.85162	1.7225	20.6	28.5	25.77	3.65089	1.15451	20.6	31.7	26.7255	5.92105	0.327937	5.41	49.7
	Left CCA Resistive Index	0.721077	0.0581206	0.00329043	0.55	0.93	0.645	0.0869866	0.0434933	0.56	0.72	0.724	0.0723187	0.0323419	0.62	0.82	0.712	0.0408656	0.0182757	0.65	0.76	0.718	0.0557375	0.0176257	0.62	0.82	0.720049	0.0588119	0.00325729	0.55	0.93
	Left CCA Systo-Diastolic Ratio	3.77555	1.02631	0.0581032	2.2	13.6599	2.94	0.701189	0.350595	2.27	3.58	3.808	1.02748	0.459504	2.64	5.44	3.5	0.475605	0.212697	2.82	4.1	3.654	0.772071	0.24415	2.64	5.44	3.76157	1.01874	0.0564227	2.2	13.6599
	Right CCA SysD [mm]	6.71437	0.522064	0.0284809	5.2	9.52	7.102	0.597305	0.188884	6.07	7.86	7.06	0.639509	0.2261	5.88	7.86	7.095	0.529609	0.187245	6.09	7.9	7.0775	0.567515	0.141879	5.88	7.9	6.74113	0.533373	0.0280335	5.2	9.52
	Right CCA DD [mm]	6.15143	0.493019	0.0268964	4.53	8.48	6.494	0.589768	0.186501	5.58	7.22	6.48875	0.571475	0.202047	5.51	7.22	6.6725	0.493262	0.174394	5.84	7.49	6.58063	0.52436	0.13109	5.51	7.49	6.17986	0.506224	0.0266065	4.53	8.48
	Right CCA IMT [mm]	0.501979	0.0838155	0.00461389	0.304	1.218	0.4801	0.0887449	0.0280636	0.365	0.605	0.538375	0.107227	0.0379106	0.335	0.682	0.656	0.213036	0.0753196	0.466	1.159	0.597187	0.173881	0.0434701	0.335	1.159	0.505643	0.0916312	0.00485644	0.304	1.218
	Right CCA Peak Systolic Velocity [cm/s]	93.5755	18.9146	1.08128	50.5	161.6	96.55	38.0922	19.0461	66.6	152.2	96.78	20.8149	9.30873	69.8	127.5	74.9333	21.5729	8.80711	32.7	92.6	84.8636	23.1553	6.98158	32.7	127.5	93.314	19.3391	1.07941	32.7	161.6
	Right CCA End Diastolic Velocity [cm/s]	25.9115	6.46926	0.369823	9.01	56.6	26.6	2.68701	1.3435	24.7	30.4	26.56	1.27397	0.569737	24.7	28.3	20.8667	4.97862	2.03251	13.7	28.5	23.4545	4.6779	1.41044	13.7	28.5	25.8359	6.39131	0.356728	9.01	56.6
	Right CCA Resistive Index	0.719709	0.0573039	0.00327585	0.53	0.88	0.7025	0.0826136	0.0413068	0.6	0.8	0.714	0.0610737	0.027313	0.62	0.79	0.708333	0.0749444	0.0305959	0.58	0.77	0.710909	0.0656437	0.0197923	0.58	0.79	0.719193	0.0577456	0.00322304	0.53	0.88
	Right CCA Systo-Diastolic Ratio	3.73117	0.897204	0.0512897	2.12	8.44	3.57	1.05436	0.527178	2.5	5.01	3.644	0.774358	0.346303	2.62	4.79	3.575	0.767926	0.313504	2.39	4.29	3.60636	0.732124	0.220744	2.39	4.79	3.72489	0.891759	0.0497731	2.12	8.44
	Left BA SysD [mm]	3.37528	0.434886	0.0597361	2.27	4.63	3.795	0.320945	0.101492	3.11	4.17	3.94125	0.434756	0.153709	3.26	4.44	4.25375	0.475002	0.167939	3.28	4.72	4.0975	0.468551	0.117138	3.26	4.72	3.57468	0.519131	0.0584068	2.27	4.72
	Left BA DD [mm]	3.20509	0.436893	0.0600119	2.02	4.44	3.654	0.336227	0.106324	2.9	4.05	3.74125	0.44076	0.155832	3.1	4.19	4.05125	0.442249	0.156359	3.09	4.52	3.89625	0.455586	0.113896	3.09	4.52	3.4019	0.514592	0.0578962	2.02	4.52
	Left BA Peak Systolic Velocity [cm/s]	75.748	16.8895	2.00441	37.3	127.1	58.8	16.4049	11.6	47.2	70.4	108.775	27.1001	13.5501	83.7	144.6	125.6	20.0177	11.5572	106.6	146.5	115.986	24.1176	9.11559	83.7	146.5	78.8451	21.0086	2.34883	37.3	146.5
	Left BA End Diastolic Velocity [cm/s]	-2.18901	10.9732	1.30228	-35.3	20.3	15.015	8.32265	5.885	9.13	20.9	22.025	5.16938	2.58469	15.2	26.6	25	8.68504	5.01431	17.1	34.3	23.3	6.40573	2.42114	15.2	34.3	0.471375	12.9838	1.45163	-35.3	34.3
	Left BA Resistive Index	0.989828	0.0776253	0.00921242	0.8	1.3	0.755	0.0777817	0.055	0.7	0.81	0.7975	0.045	0.0225	0.73	0.82	0.806667	0.0351188	0.0202759	0.77	0.84	0.801429	0.0380476	0.0143806	0.73	0.84	0.967472	0.0977792	0.010932	0.7	1.3
	Arterial stiffness and stiffness gradient parameters
	Carotid-Femoral PWV [m/s]	6.48401	1.01884	0.0566021	4.10065	10.5217	5.48682	0.688559	0.217741	4.10619	6.58436	6.03987	0.583621	0.206341	5	6.84736	7.0665	1.02509	0.362425	5.6	8.96	6.55319	0.964566	0.241141	5	8.96	6.45869	1.02028	0.0545365	4.10065	10.5217
	Carotid-Radial PWV [m/s]	8.83309	1.40159	0.120185	5.1	12.9	7.182	1.54508	0.488598	5.24	9.64	6.80375	0.94933	0.335639	5.58	8.01	5.95625	1.06192	0.375447	4.69	8.21	6.38	1.06694	0.266735	4.69	8.21	8.48889	1.59212	0.125089	4.69	12.9
	PWV Ratio (cfPWV/crPWV)	0.714071	0.114615	0.00986451	0.485752	1.03333	0.789301	0.165724	0.0524067	0.560169	1.0468	0.896552	0.100299	0.0354611	0.775597	1.05669	1.21735	0.258202	0.0912883	0.785248	1.50067	1.05695	0.251494	0.0628736	0.775597	1.50067	0.752818	0.170517	0.0134386	0.485752	1.50067
	Left BA Elastic Modulus [mmHg]	1175.62	729.147	100.156	267.094	3921.33	1444.93	592.357	187.32	590.727	2393.14	1143.53	531.725	187.993	429.857	1977.6	1171.64	399.346	141.19	742.5	1804.62	1157.59	454.505	113.626	429.857	1977.6	1206.06	665.64	74.8903	267.094	3921.33
	Left CCA Elastic Modulus [mmHg]	357.395	115.988	6.48391	172.674	831.3	360.516	128.713	42.9042	237.311	647.1	412.101	117.296	41.4703	245.714	594	591.954	199.704	70.606	310.05	790.176	502.027	183.461	45.8652	245.714	790.176	364.184	123.513	6.64969	172.674	831.3
	Right CCA Elastic Modulus [mmHg]	364.279	116.318	6.54337	173.25	912.667	344.775	68.7192	22.9064	240	437.945	381.9	104.587	36.9773	295.317	567.286	601.973	207.676	73.4245	321.158	877.931	491.937	195.312	48.8281	295.317	877.931	369.754	122.784	6.64913	173.25	912.667
	Mean CCA Elastic Modulus [mmHg]	360.384	106.558	5.93827	187.882	747.37	352.646	92.9052	30.9684	238.656	528.562	397	107.043	37.8452	290.265	580.643	596.963	194.44	68.7449	315.604	834.054	496.982	183.448	45.8619	290.265	834.054	366.482	114.105	6.12546	187.882	834.054
	Left CCA/BA Elastic Modulus Ratio	0.434032	0.288637	0.0400267	0.0635838	1.67721	0.279896	0.167185	0.0557283	0.13985	0.628863	0.436559	0.213441	0.0754629	0.169803	0.727945	0.578554	0.318147	0.112482	0.208758	1.03996	0.507556	0.271793	0.0679483	0.169803	1.03996	0.431294	0.278159	0.0316991	0.0635838	1.67721
	Right CCA/BA Elastic Modulus Ratio	0.446013	0.279021	0.0386933	0.0930165	1.32551	0.2609	0.112708	0.0375692	0.141026	0.406279	0.400039	0.18898	0.0668143	0.149331	0.689821	0.573728	0.30736	0.108668	0.283391	1.07233	0.486884	0.262292	0.065573	0.149331	1.07233	0.432869	0.267196	0.0304498	0.0930165	1.32551
	Mean CCA BA Elastic Modulus Ratio	0.440022	0.268975	0.0373002	0.087785	1.37346	0.270398	0.136574	0.0455246	0.15139	0.513665	0.418299	0.199515	0.070539	0.166676	0.708883	0.576141	0.306244	0.108274	0.246074	1.02336	0.49722	0.262653	0.0656632	0.166676	1.02336	0.432081	0.261076	0.0297523	0.087785	1.37346

## Sheet: Table_S1
	Table S1. Demographic, anthropometric, clinical and cardiovascular characteristics according to the study groups
	Variables	Non-Pregnant					Healthy Pregnant					Pregnant Gestational Hypertension					Pregnant Preeclampsia					Pregnancy-associated hypertension					Total Women
		MV	SD	SE	Min	Max	MV	SD	SE	Min	Max	MV	SD	DE	Min	Max	MV	SD	DE	Min	Max	MV	SD	DE	Min	Max	MV	SD	DE	Min	Max
	Age [years]	22.8444	5.98907	0.29908	18	40.7	29.4	6.16802	1.9505	21	40	30.875	6.68554	2.36369	20	40	33.625	5.87823	2.07827	22	40	32.25	6.245	1.56125	20	40	23.3504	6.31915	0.305805	18	40.7
	Body weight [Kg.]	60.7496	12.0537	0.615918	38.1	128	67.1	7.325	2.31637	56	77	76.5	10.9022	3.8545	60	90	97	12.5584	4.44008	83	113	86.75	15.5285	3.88212	60	113	61.922	13.1226	0.648873	38.1	128
	Body height [m]	1.62218	0.063831	0.00325313	1.32	1.83	157.6	6.75278	2.13542	148	173	159.625	5.34355	1.88923	150	166	160.25	8.61477	3.04578	149	174	159.938	6.93271	1.73318	149	174	11.5804	38.4037	1.89432	1.32	174
	Body mass index [Kg/m2]	23.0423	4.23232	0.216828	16.5	48.77	27.1321	3.56149	1.12624	20.7157	31.2295	30.2119	5.42044	1.91641	21.77	38.2222	38.1019	6.59759	2.3326	27.7447	48.272	34.1569	7.11512	1.77878	21.77	48.272	23.5798	4.88955	0.242366	16.5	48.77
	Cardiovascular risk factors
	Hypertension [%]	0.04					0					1					1					1					0.0749415
	On Hypertension treatment [%]	0.017					0					0.125					0.125					0.125					0.0210773
	Dyslipidemia [%]	0.072					0.2					0					0					0					0.0725995
	Diabetes [%]	0					0					0					0					0					0
	Sedentarism [%]	0.586					1					1					1					1					0.630081
	Atherosclerotic plaques [%]	0					0					0					0					0					0
	Peripheral and central haemodynamic parameters
	baSBP [mmHg]	117.61	10.6991	0.541768	85	177	114	5.07718	1.60555	106	121	122.5	13.2557	4.68661	98	138	131.25	9.19239	3.25	114	143	126.875	11.9101	2.97752	98	143	117.88	10.7951	0.529275	85	177
	baDBP [mmHg]	69.2205	8.91044	0.451198	49	103	65.1	10.0935	3.19183	52	85	72	8.97616	3.17355	59	82	77.75	8.58154	3.03403	68	93	74.875	8.98795	2.24699	59	93	69.3389	9.00993	0.441748	49	103
	HR [bpm]	74.7769	10.9126	0.552579	50	113	81.3	15.9586	5.04656	52	97	86.25	9.16125	3.23899	72	96	87.125	16.8729	5.96549	66	110	86.6875	13.1236	3.2809	66	110	75.3918	11.3792	0.557913	50	113
	aoSBP [mmHg]	101.767	9.88468	0.508413	79	156	99.7778	6.75977	2.25326	90	109	105.625	11.4635	4.05294	84	120	114.625	9.10161	3.2179	99	126	110.125	11.0265	2.75662	84	126	102.055	9.99313	0.497793	79	156
	aoDBP [mmHg]	70.3783	8.9749	0.461619	51	103	67.3333	10.2103	3.40343	55	87	73.875	9.4027	3.32436	60	85	79.25	8.32809	2.94443	70	94	76.5625	9.01827	2.25457	60	94	70.5558	9.07452	0.452034	51	103
	Carotid and brachial strctural and haemodynamic parameters
	Left CCA SysD [mm]	6.60518	0.492933	0.026733	4.84	9.55	7.075	0.386731	0.122295	6.13	7.49	7.1575	0.271806	0.096098	6.89	7.53	7.10125	0.670659	0.237114	5.78	7.98	7.12938	0.495197	0.123799	5.78	7.98	6.64093	0.506212	0.0264601	4.84	9.55
	Left CCA DD [mm]	6.04047	0.471279	0.0255587	4.39	8.4	6.467	0.423584	0.133949	5.75	7.19	6.605	0.213675	0.0755456	6.37	6.93	6.66875	0.645787	0.22832	5.55	7.54	6.63688	0.465843	0.116461	5.55	7.54	6.0782	0.488645	0.0255419	4.39	8.4
	Left CCA IMT [mm]	0.503603	0.0902003	0.0048918	0.311	1.352	0.5271	0.0821319	0.0259724	0.422	0.67	0.533875	0.0892387	0.0315507	0.387	0.644	0.594625	0.0973094	0.0344041	0.473	0.774	0.56425	0.0954955	0.0238739	0.387	0.774	0.506896	0.0909017	0.00475151	0.311	1.352
	Left CCA PSV [cm/s]	97.4163	19.3056	1.09297	55.8	191.9	85.15	21.1137	10.5569	68.5	116.1	100.7	27.824	12.4433	79.9	144.6	87.2	17.0193	7.61124	59	100.9	93.95	22.8788	7.2349	59	144.6	97.1595	19.4273	1.07598	55.8	191.9
	Left CCA EDV [cm/s]	26.7225	5.98815	0.339012	5.41	49.7	29.35	5.34322	2.67161	22.2	34.3	26.64	3.64184	1.62868	22.8	31.7	24.9	3.85162	1.7225	20.6	28.5	25.77	3.65089	1.15451	20.6	31.7	26.7255	5.92105	0.327937	5.41	49.7
	Left CCA RI	0.721077	0.0581206	0.00329043	0.55	0.93	0.645	0.0869866	0.0434933	0.56	0.72	0.724	0.0723187	0.0323419	0.62	0.82	0.712	0.0408656	0.0182757	0.65	0.76	0.718	0.0557375	0.0176257	0.62	0.82	0.720049	0.0588119	0.00325729	0.55	0.93
	Left CCA SDR	3.77555	1.02631	0.0581032	2.2	13.6599	2.94	0.701189	0.350595	2.27	3.58	3.808	1.02748	0.459504	2.64	5.44	3.5	0.475605	0.212697	2.82	4.1	3.654	0.772071	0.24415	2.64	5.44	3.76157	1.01874	0.0564227	2.2	13.6599
	Right CCA SysD [mm]	6.71437	0.522064	0.0284809	5.2	9.52	7.102	0.597305	0.188884	6.07	7.86	7.06	0.639509	0.2261	5.88	7.86	7.095	0.529609	0.187245	6.09	7.9	7.0775	0.567515	0.141879	5.88	7.9	6.74113	0.533373	0.0280335	5.2	9.52
	Right CCA DD [mm]	6.15143	0.493019	0.0268964	4.53	8.48	6.494	0.589768	0.186501	5.58	7.22	6.48875	0.571475	0.202047	5.51	7.22	6.6725	0.493262	0.174394	5.84	7.49	6.58063	0.52436	0.13109	5.51	7.49	6.17986	0.506224	0.0266065	4.53	8.48
	Right CCA IMT [mm]	0.501979	0.0838155	0.00461389	0.304	1.218	0.4801	0.0887449	0.0280636	0.365	0.605	0.538375	0.107227	0.0379106	0.335	0.682	0.656	0.213036	0.0753196	0.466	1.159	0.597187	0.173881	0.0434701	0.335	1.159	0.505643	0.0916312	0.00485644	0.304	1.218
	Right CCA PSV [cm/s]	93.5755	18.9146	1.08128	50.5	161.6	96.55	38.0922	19.0461	66.6	152.2	96.78	20.8149	9.30873	69.8	127.5	74.9333	21.5729	8.80711	32.7	92.6	84.8636	23.1553	6.98158	32.7	127.5	93.314	19.3391	1.07941	32.7	161.6
	Right CCA EDV [cm/s]	25.9115	6.46926	0.369823	9.01	56.6	26.6	2.68701	1.3435	24.7	30.4	26.56	1.27397	0.569737	24.7	28.3	20.8667	4.97862	2.03251	13.7	28.5	23.4545	4.6779	1.41044	13.7	28.5	25.8359	6.39131	0.356728	9.01	56.6
	Right CCA RI	0.719709	0.0573039	0.00327585	0.53	0.88	0.7025	0.0826136	0.0413068	0.6	0.8	0.714	0.0610737	0.027313	0.62	0.79	0.708333	0.0749444	0.0305959	0.58	0.77	0.710909	0.0656437	0.0197923	0.58	0.79	0.719193	0.0577456	0.00322304	0.53	0.88
	Right CCA SDR	3.73117	0.897204	0.0512897	2.12	8.44	3.57	1.05436	0.527178	2.5	5.01	3.644	0.774358	0.346303	2.62	4.79	3.575	0.767926	0.313504	2.39	4.29	3.60636	0.732124	0.220744	2.39	4.79	3.72489	0.891759	0.0497731	2.12	8.44
	Left BA SysD [mm]	3.37528	0.434886	0.0597361	2.27	4.63	3.795	0.320945	0.101492	3.11	4.17	3.94125	0.434756	0.153709	3.26	4.44	4.25375	0.475002	0.167939	3.28	4.72	4.0975	0.468551	0.117138	3.26	4.72	3.57468	0.519131	0.0584068	2.27	4.72
	Left BA DD [mm]	3.20509	0.436893	0.0600119	2.02	4.44	3.654	0.336227	0.106324	2.9	4.05	3.74125	0.44076	0.155832	3.1	4.19	4.05125	0.442249	0.156359	3.09	4.52	3.89625	0.455586	0.113896	3.09	4.52	3.4019	0.514592	0.0578962	2.02	4.52
	Left BA PSV [cm/s]	75.748	16.8895	2.00441	37.3	127.1	58.8	16.4049	11.6	47.2	70.4	108.775	27.1001	13.5501	83.7	144.6	125.6	20.0177	11.5572	106.6	146.5	115.986	24.1176	9.11559	83.7	146.5	78.8451	21.0086	2.34883	37.3	146.5
	Left BA EDV [cm/s]	-2.18901	10.9732	1.30228	-35.3	20.3	15.015	8.32265	5.885	9.13	20.9	22.025	5.16938	2.58469	15.2	26.6	25	8.68504	5.01431	17.1	34.3	23.3	6.40573	2.42114	15.2	34.3	0.471375	12.9838	1.45163	-35.3	34.3
	Left BA RI	0.989828	0.0776253	0.00921242	0.8	1.3	0.755	0.0777817	0.055	0.7	0.81	0.7975	0.045	0.0225	0.73	0.82	0.806667	0.0351188	0.0202759	0.77	0.84	0.801429	0.0380476	0.0143806	0.73	0.84	0.967472	0.0977792	0.010932	0.7	1.3
	Arterial stiffness and stiffness gradient parameters
	cfPWV [m/s]	6.48401	1.01884	0.0566021	4.10065	10.5217	5.48682	0.688559	0.217741	4.10619	6.58436	6.03987	0.583621	0.206341	5	6.84736	7.0665	1.02509	0.362425	5.6	8.96	6.55319	0.964566	0.241141	5	8.96	6.45869	1.02028	0.0545365	4.10065	10.5217
	crPWV [m/s]	8.83309	1.40159	0.120185	5.1	12.9	7.182	1.54508	0.488598	5.24	9.64	6.80375	0.94933	0.335639	5.58	8.01	5.95625	1.06192	0.375447	4.69	8.21	6.38	1.06694	0.266735	4.69	8.21	8.48889	1.59212	0.125089	4.69	12.9
	PWV Ratio (cfPWV/crPWV)	0.714071	0.114615	0.00986451	0.485752	1.03333	0.789301	0.165724	0.0524067	0.560169	1.0468	0.896552	0.100299	0.0354611	0.775597	1.05669	1.21735	0.258202	0.0912883	0.785248	1.50067	1.05695	0.251494	0.0628736	0.775597	1.50067	0.752818	0.170517	0.0134386	0.485752	1.50067
	Left BA EM [mmHg]	1175.62	729.147	100.156	267.094	3921.33	1444.93	592.357	187.32	590.727	2393.14	1143.53	531.725	187.993	429.857	1977.6	1171.64	399.346	141.19	742.5	1804.62	1157.59	454.505	113.626	429.857	1977.6	1206.06	665.64	74.8903	267.094	3921.33
	Left CCA EM [mmHg]	357.395	115.988	6.48391	172.674	831.3	360.516	128.713	42.9042	237.311	647.1	412.101	117.296	41.4703	245.714	594	591.954	199.704	70.606	310.05	790.176	502.027	183.461	45.8652	245.714	790.176	364.184	123.513	6.64969	172.674	831.3
	Right CCA EM [mmHg]	364.279	116.318	6.54337	173.25	912.667	344.775	68.7192	22.9064	240	437.945	381.9	104.587	36.9773	295.317	567.286	601.973	207.676	73.4245	321.158	877.931	491.937	195.312	48.8281	295.317	877.931	369.754	122.784	6.64913	173.25	912.667
	Mean CCA EM [mmHg]	360.384	106.558	5.93827	187.882	747.37	352.646	92.9052	30.9684	238.656	528.562	397	107.043	37.8452	290.265	580.643	596.963	194.44	68.7449	315.604	834.054	496.982	183.448	45.8619	290.265	834.054	366.482	114.105	6.12546	187.882	834.054
	Left CCA/BA EM Ratio	0.434032	0.288637	0.0400267	0.0635838	1.67721	0.279896	0.167185	0.0557283	0.13985	0.628863	0.436559	0.213441	0.0754629	0.169803	0.727945	0.578554	0.318147	0.112482	0.208758	1.03996	0.507556	0.271793	0.0679483	0.169803	1.03996	0.431294	0.278159	0.0316991	0.0635838	1.67721
	Right CCA/BA EM Ratio	0.446013	0.279021	0.0386933	0.0930165	1.32551	0.2609	0.112708	0.0375692	0.141026	0.406279	0.400039	0.18898	0.0668143	0.149331	0.689821	0.573728	0.30736	0.108668	0.283391	1.07233	0.486884	0.262292	0.065573	0.149331	1.07233	0.432869	0.267196	0.0304498	0.0930165	1.32551
	Mean CCA BA EM Ratio	0.440022	0.268975	0.0373002	0.087785	1.37346	0.270398	0.136574	0.0455246	0.15139	0.513665	0.418299	0.199515	0.070539	0.166676	0.708883	0.576141	0.306244	0.108274	0.246074	1.02336	0.49722	0.262653	0.0656632	0.166676	1.02336	0.432081	0.261076	0.0297523	0.087785	1.37346
	MV: mean value. SD: estándar deviation. SE: estándar error of the mean. Min: minimal value. Max: maximal value. BW: body weight. BH: body height. BMI: Body mass index. SBP, DBP: systolic and diastolic blood pressure (ao: aortic, ba: brachial). HR: heart rate. CCA: Common carotid artery. SysD, DD: peak systolic and end-diastolic diameter. IMT: intima-media thickness. PSV, EDV: peak systolic and en…
